# Supplementary material for: The adaptor protein Grb2b is an essential modulator for lympho-venous sprout formation in the zebrafish trunk
Source: PubMed Central journal article supplement (PMC8205915; doi:10.1007/s10456-021-09774-w), 2021-03-07

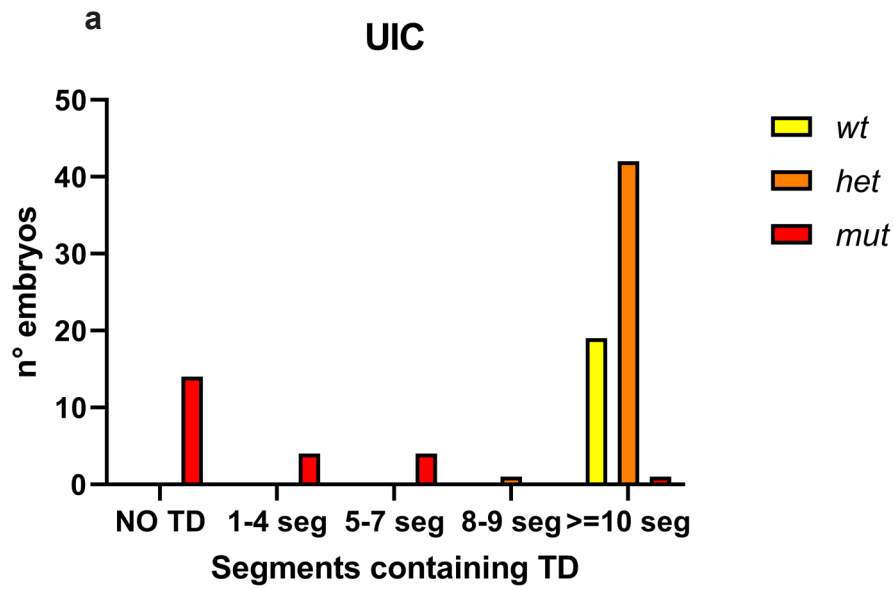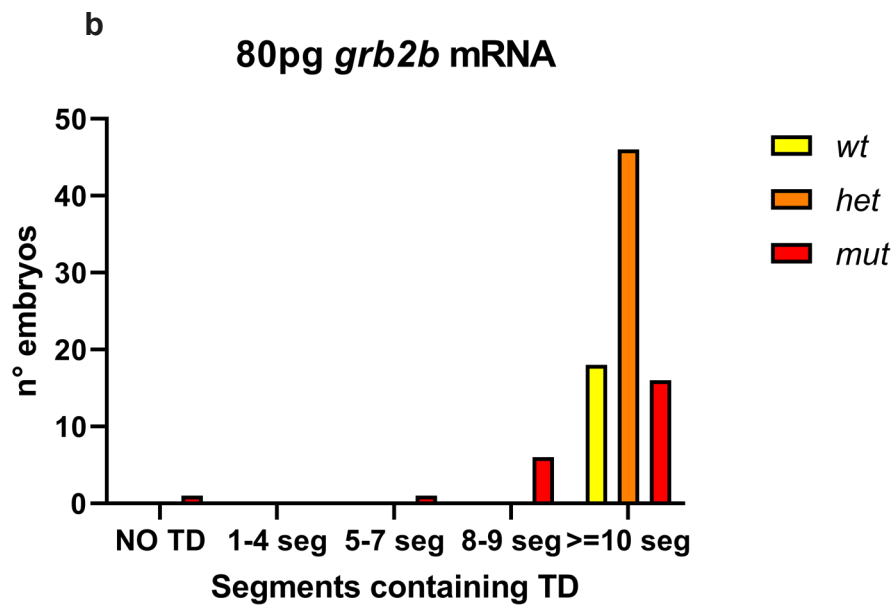

Supplement: 10456_2021_9774_MOESM2_ESM.pdf [file 10456_2021_9774_MOESM2_ESM.pdf]
